# Supplementary material for: ATM-dependent phosphorylation of SNEVhPrp19/hPso4 is involved in extending cellular life span and suppression of apoptosis
Source: Aging (Albany NY). 2012 Apr 20;4(4):290–304. doi: 10.18632/aging.100452 (PMC3371764; doi:10.18632/aging.100452)
Supplement: Supplemental Table [file aging-04-290-s006.xlsx]

## Sheet: Sheet1
Description
SNEV-construct
Identification Confidence Level	Sequence	Sequest Modifications	Activation Type	pRS Site Probabilities	Protein Site	# Types of Phospho Sites	XCorr	# Missed Cleavages	Charge	m/z [Da]	MH+ [Da]	ΔM [ppm]	First Scan	MS Order	Ions Matched	Spectrum File
High	AVPsSQPSVVGAGEPmDLGELVGm	S4(Phospho); M16(Oxidation); M24(Oxidation)	CID	S(4): 33.3; S(5): 33.3; S(8): 33.3		1 non localized phosphosite	3.35327	0	2	1220.04	2439.08	-1.59884	13329	MS2	21/68	Dellago_SNEV_H2O2_TiO2.raw
High	AVPSSQPsVVGAGEPmDLGELVGm	S8(Phospho); M16(Oxidation); M24(Oxidation)	CID	S(4): 84.4; S(5): 13.3; S(8): 2.2	S148	1 medium confidence localized phosphosite	4.16435	0	3	813.699	2439.08	-0.177995	13390	MS2	35/136	Dellago_SNEV_H2O2_TiO2.raw
High	AVPsSQPSVVGAGEPmDLGELVGmTPEIIQKL	S4(Phospho); M16(Oxidation); M24(Oxidation)	CID	S(4): 18.7; S(5): 76.5; S(8): 4.8; T(25): 0.0	S149	1 medium confidence localized phosphosite	3.41529	0	3	1121.22	3361.64	1.47401	14172	MS2	33/184	Dellago_SNEV_H2O2_TiO2.raw
Site probability
high confidence	> 95%
medium confidence	< 95% and > 75%
